# Supplementary material for: Expression and Role of MicroRNAs from the miR-200 Family in the Tumor Formation and Metastatic Propensity of Pancreatic Cancer
Source: PubMed Central journal article supplement — Mol Ther Nucleic Acids. 2019 Jun 29;17:491–503. doi: 10.1016/j.omtn.2019.06.015 (PMC6656921; doi:10.1016/j.omtn.2019.06.015), 2019-06-29
Supplement: mmc1.pdf [file mmc1.pdf]

OMTN, Volume 17

## **Supplemental Information**

### **Expression and Role of MicroRNAs from the miR-200 Family in the Tumor Formation and Metastatic Propensity of Pancreatic Cancer**

**Zamira Vanessa Diaz-Riascos, Mireia M. Ginesta, Joan Fabregat, Teresa Serrano, Juli Busquets, Louis Buscail, Pierre Cordelier, and Gabriel Capellá**

# Supplementary Table 1

| Sample          | miR-200a        |        | miR-200b        |        | miR-200c        |        | miR-141         |        | miR-429         |        | miR-205         |        | ZEB1            |        | ZEB2            |        | CDH1               |        |
|-----------------|-----------------|--------|-----------------|--------|-----------------|--------|-----------------|--------|-----------------|--------|-----------------|--------|-----------------|--------|-----------------|--------|--------------------|--------|
|                 | Tumor           | Normal | Tumor              | Normal |
| TP1T            | 0.0035          | 0.0021 | 0.0231          | 0.0177 | 0.0003          | 0.0006 | 0.0884          | 1.1262 | 0.0343          | 0.0421 | 0.0004          | 0.0002 | 0.0031          | 0.0004 | 0.0027          | 0.0013 | 0.0176             | 0.1080 |
| TP4T            | 0.0034          | 0.0008 | 0.0182          | 0.0072 | 0.0002          | 0.0003 | 0.0478          | 0.1083 | 0.0249          | 0.0053 | 0.3826          | 0.0002 | 0.0020          | 0.0004 | 0.0017          | 0.0016 | 0.0629             | 0.0777 |
| TP6T            | 0.2025          | 0.0250 | 0.0104          | 0.0047 | 0.0004          | 0.0001 | 0.3011          | 0.0164 | 0.0567          | 0.0071 | 0.1413          | 0.0192 | 0.0001          | 0.0003 | 0.0002          | 0.0003 | 0.0520             | 0.0208 |
| TP9T            | 0.0029          | 0.0014 | 0.0161          | 0.0047 | 0.0002          | 0.0003 | 0.1686          | 0.5136 | 0.0234          | 0.0118 | 0.0259          | 0.0001 | 0.0005          | 0.0002 | 0.0004          | 0.0006 | 0.0847             | 0.1424 |
| TP10T           | 0.0025          | 0.0035 | 0.0271          | 0.0214 | 0.0014          | 0.0006 | 0.4481          | 0.8491 | 0.0602          | 0.0261 | 0.1716          | 0.0003 | 0.0002          | 0.0005 | 0.0010          | 0.0006 | 0.0247             | 0.1263 |
| TP11T           | 0.1026          | 0.0016 | 0.0060          | 0.0137 | 0.0004          | 0.0007 | 0.3296          | 1.0695 | 0.0177          | 0.0256 | 0.0001          | 0.0003 | 0.0003          | 0.0001 | 0.0003          | 0.0015 | 0.1059             | 0.1721 |
| TP12T           | 0.0025          | 0.0403 | 0.0049          | 0.0037 | 0.0005          | 0.0003 | 0.0982          | 0.0819 | 0.0128          | 0.0056 | 0.0001          | 0.0019 | 0.0002          | 0.0004 | 0.0027          | 0.0017 | 0.0273             | 0.1220 |
| TP16T           | 0.1574          | 0.1350 | 0.0144          | 0.0155 | 0.0003          | 0.0007 | 0.1111          | 0.2437 | 0.0961          | 0.0764 | 0.0249          | 0.0153 | 0.0051          | 0.0003 | 0.0053          | 0.0022 | 0.0300             | 0.1388 |
| TP17T           | 0.1690          | 0.0914 | 0.0224          | 0.0058 | 0.0005          | 0.0001 | 0.2653          | 0.0200 | 0.0382          | 0.0408 | 1.2389          | 0.0002 | 0.0003          | 0.0032 | 0.0023          | 0.0102 | 0.1368             | 0.0610 |
| TP18T           | 0.0877          | 0.0598 | 0.0052          | 0.0106 | 0.0004          | 0.0006 | 0.4353          | 0.2425 | 0.0519          | 0.0171 | 0.0005          | 0.0000 | 0.0002          | 0.0000 | 0.0007          | 0.0019 | 0.0167             | 0.0819 |
| TP20T           | 0.0027          | 0.0010 | 0.0135          | 0.0104 | 0.0003          | 0.0004 | 0.2684          | 0.1227 | 0.0191          | 0.0065 | 0.0002          | 0.0002 | 0.0010          | 0.0005 | 0.0022          | 0.0016 | 0.0603             | 0.0471 |
| TP26T           | 0.0803          | 0.0069 | 0.0044          | 0.0004 | 0.0007          | 0.0001 | 0.3013          | 0.0417 | 0.0279          | 0.0025 | 0.2487          | 0.0007 | 0.0002          | 0.0002 | 0.0014          | 0.0003 | 0.1208             | 0.0896 |
| TP29T           | 0.0032          | 0.0006 | 0.0359          | 0.0124 | 0.0006          | 0.0003 | 0.1058          | 0.0519 | 0.0405          | 0.0044 | 0.0139          | 0.0020 | 0.0039          | 0.0005 | 0.0020          | 0.0018 | 0.0358             | 0.0539 |
| TP30T           | 0.0054          | 0.1466 | 0.0241          | 0.0172 | 0.0011          | 0.0004 | 0.3562          | 0.1816 | 0.0775          | 0.0284 | 0.0005          | 0.0001 | 0.0012          | 0.0007 | 0.0010          | 0.0034 | 0.0687             | 0.0558 |
| TP31T           | 0.0012          | 0.0009 | 0.0053          | 0.0143 | 0.0002          | 0.0002 | 0.0738          | 0.0563 | 0.0155          | 0.0055 | 0.0000          | 0.0116 | 0.0021          | 0.0019 | 0.0105          | 0.0036 | 0.0726             | 0.1217 |
| TP32T           | 0.1069          | 0.4487 | 0.0052          | 0.0125 | 0.0001          | 0.0036 | 0.0208          | 1.0830 | 0.0292          | 0.1234 | 0.0000          | 0.0002 | 0.0012          | 0.0002 | 0.0017          | 0.0003 | 0.0664             | 0.1356 |
| TP33T           | 0.0023          | 0.0072 | 0.0168          | 0.0221 | 0.0004          | 0.0010 | 0.0319          | 0.4910 | 0.0144          | 0.0321 | 0.0002          | 0.0077 | 0.0074          | 0.0014 | 0.0027          | 0.0023 | 0.0504             | 0.1124 |
| TP36T           | 0.0028          | 0.0017 | 0.0122          | 0.0084 | 0.0007          | 0.0003 | 0.1689          | 0.1050 | 0.0273          | 0.0111 | 2.0433          | 0.0003 | 0.0010          | 0.0012 | 0.0034          | 0.0024 | 0.0800             | 0.0702 |
| TP37T           | 0.0033          | 0.0206 | 0.0247          | 0.0131 | 0.0002          | 0.0002 | 0.0254          | 0.0186 | 0.0380          | 0.0038 | 0.0209          | 0.0001 | 0.0042          | 0.0011 | 0.0029          | 0.0044 | 0.0484             | 0.0926 |
| TP38T           | 0.0036          | 0.0077 | 0.0144          | 0.0207 | 0.0004          | 0.0004 | 0.0543          | 0.1880 | 0.0112          | 0.0495 | 0.0001          | 0.0000 | 0.0042          | 0.0008 | 0.0039          | 0.0025 | 0.0352             | 0.0895 |
| TP39T           | 0.2640          | 0.0980 | 0.0126          | 0.0083 | 0.0007          | 0.0003 | 0.6613          | 0.1981 | 0.0772          | 0.0398 | 0.0024          | 0.0009 | 0.0037          | 0.0028 | 0.0030          | 0.0129 | 0.0598             | 0.0531 |
| TP40T           | 0.2739          | 0.0008 | 0.0085          | 0.0004 | 0.0005          | 0.0000 | 0.3147          | 0.0016 | 0.1293          | 0.0003 | 0.0029          | 0.0000 | 0.0006          | 0.0015 | 0.0011          | 0.0053 | 0.0499             | 0.0540 |
| TP41T           | 0.0750          | 0.0019 | 0.0089          | 0.0062 | 0.0003          | 0.0003 | 0.0607          | 0.1934 | 0.0254          | 0.0132 | 0.1675          | 0.0002 | 0.0016          | 0.0017 | 0.0015          | 0.0040 | 0.0442             | 0.0608 |
| TP47T           | 0.0011          | 0.0008 | 0.0050          | 0.0092 | 0.0003          | 0.0002 | 0.0614          | 0.0345 | 0.0129          | 0.0048 | 0.6392          | 0.0001 | 0.0013          | 0.0008 | 0.0082          | 0.0041 | 0.0273             | 0.0716 |
| TP48T           | 0.0180          | 0.0011 | 0.0054          | 0.0069 | 0.0001          | 0.0004 | 0.0165          | 0.2230 | 0.0230          | 0.0080 | 0.0420          | 0.0001 | 0.0003          | 0.0007 | 0.0014          | 0.0012 | 0.0340             | 0.0933 |
| TP50T           | 0.0171          | 0.0258 | 0.0113          | 0.0124 | 0.0002          | 0.0004 | 0.0357          | 0.1018 | 0.0039          | 0.0093 | 0.0529          | 0.0000 | 0.0012          | 0.0011 | 0.0034          | 0.0023 | 0.0757             | 0.1172 |
| TP51T           | 0.1078          | 0.0673 | 0.0164          | 0.0028 | 0.0004          | 0.0002 | 0.1550          | 0.1209 | 0.0615          | 0.0250 | 0.0000          | 0.0002 | 0.0012          | 0.0013 | 0.0023          | 0.0068 | 0.0441             | 0.0591 |
| TP52T           | 0.0756          | 0.0165 | 0.0091          | 0.0073 | 0.0005          | 0.0003 | 0.0331          | 0.0422 | 0.0225          | 0.0086 | 0.0001          | 0.0001 | 0.0024          | 0.0081 | 0.0034          | 0.0057 | 0.0403             | 0.0699 |
| TP54T           | 0.0699          | 0.0206 | 0.0294          | 0.0099 | 0.0004          | 0.0002 | 0.0939          | 0.0399 | 0.0307          | 0.0070 | 0.0012          | 0.0000 | 0.0012          | 0.0049 | 0.0029          | 0.0047 | 0.0649             | 0.0872 |
| TP56T           | 0.0044          | 0.0332 | 0.0023          | 0.0101 | 0.0002          | 0.0004 | 0.0263          | 0.0616 | 0.0029          | 0.0100 | 0.1321          | 0.0016 | 0.0006          | 0.0018 | 0.0022          | 0.0031 | 0.0117             | 0.0714 |
| TP57T           | 0.3280          | 0.0412 | 0.0193          | 0.0168 | 0.0007          | 0.0006 | 0.2219          | 0.0713 | 0.1387          | 0.0099 | 0.0068          | 0.0001 | 0.0000          | 0.0001 | 0.0000          | 0.0003 | 0.0473             | 0.0935 |
| Overexpression  | 14 of 31<br>45% |        | 9 of 31<br>29%  |        | 19 of 31<br>61% |        | 9 of 31<br>29%  |        | 8 of 31<br>26%  |        | 20 of 31<br>65% |        | 13 of 31<br>42% |        | 5 of 31<br>16%  |        | 2 of 31<br>6.50%   |        |
| Underexpression | 7 of 31<br>23%  |        | 4 of 31<br>13%  |        | 5 of 31<br>16%  |        | 12 of 31<br>39% |        | 5 of 31<br>16%  |        | 6 of 31<br>19%  |        | 9 of 31<br>29%  |        | 9 of 31<br>29%  |        | 11 of 31<br>35.50% |        |
| No difference   | 10 of 31<br>32% |        | 18 of 31<br>58% |        | 7 of 31<br>23%  |        | 10 of 31<br>32% |        | 18 of 31<br>58% |        | 5 of 31<br>16%  |        | 9 of 31<br>29%  |        | 17 of 31<br>55% |        | 18 of 31<br>58%    |        |

Fold Change ( $2^{-\Delta\Delta Ct}$  tumor/ $2^{-\Delta\Delta Ct}$  normal) >2: overexpression

Fold Change ( $2^{-\Delta\Delta Ct}$  tumor/ $2^{-\Delta\Delta Ct}$  normal) <0.5: underexpression

Individual qPCR values (shown as  $2^{-\Delta Ct}$ ) of the genes of interest in primary tumors and matching normal adjacent tissue

## Supplementary Table 2

|      | miR-200a | miR-200b | miR-200c | miRr-141 | miR-429 | miR-205 | ZEB1 | ZEB2 | CDH1 |
|------|----------|----------|----------|----------|---------|---------|------|------|------|
| TP6  | 8,1      | 2,21     | 3,34     | 18,36    | 8,02    | 7,35    | 0,44 | 0,52 | 2,5  |
| TP26 | 11,72    | 10,81    | 10,14    | 7,22     | 11,28   | 347,2   | 0,89 | 5,38 | 1,35 |
| TP29 | 5        | 2,9      | 2,13     | 2,04     | 9,3     | 6,94    | 7,62 | 1,06 | 0,66 |
| TP40 | 336,74   | 23,46    | 11,15    | 192      | 469,18  | 101,9   | 0,41 | 0,21 | 0,92 |
| TP54 | 3,39     | 2,97     | 1,77     | 2,35     | 4,38    | 23,66   | 0,25 | 0,61 | 0,74 |
| TP4  | 4,4      | 2,54     | 0,76     | 0,44     | 4,72    | 2127,9  | 4,65 | 1,08 | 0,81 |
| TP17 | 1,85     | 3,88     | 3,28     | 13,29    | 0,93    | 7247,8  | 0,09 | 0,22 | 2,24 |
| TP39 | 2,69     | 1,52     | 2,72     | 3,34     | 1,94    | 2,67    | 1,29 | 0,23 | 1,13 |
| TP57 | 7,96     | 1,15     | 1,13     | 3,11     | 13,95   | 52,87   | 0,1  | 0,08 | 0,51 |
| TP9  | 2,11     | 3,44     | 0,8      | 0,33     | 1,98    | 195,98  | 2,01 | 0,58 | 0,59 |
| TP10 | 0,71     | 1,27     | 2,47     | 0,53     | 2,31    | 576,52  | 0,49 | 1,7  | 0,2  |
| TP20 | 2,63     | 1,3      | 0,79     | 2,19     | 2,93    | 0,93    | 2,18 | 1,33 | 1,28 |
| TP30 | 0,04     | 1,4      | 2,9      | 1,96     | 2,73    | 9,1     | 1,77 | 0,29 | 1,23 |
| TP36 | 1,64     | 1,45     | 2,24     | 1,61     | 2,47    | 6144    | 0,83 | 1,41 | 1,14 |
| TP47 | 1,35     | 0,55     | 1,91     | 1,78     | 2,68    | 4722,1  | 1,64 | 1,99 | 0,38 |
| TP51 | 1,6      | 5,85     | 1,61     | 1,28     | 2,46    | 351,26  | 0,93 | 0,34 | 0,75 |
| TP18 | 1,47     | 0,5      | 0,72     | 1,79     | 3,03    | 14,73   | 11   | 0,38 | 0,2  |
| TP37 | 0,16     | 1,89     | 0,76     | 1,37     | 9,99    | 348,43  | 3,75 | 0,66 | 0,52 |
| TP41 | 40,24    | 1,43     | 0,91     | 0,31     | 1,92    | 920,15  | 0,95 | 0,36 | 0,73 |
| TP48 | 15,92    | 0,79     | 0,25     | 0,07     | 2,87    | 0,55    | 0,42 | 1,18 | 0,36 |
| TP52 | 4,58     | 1,25     | 1,51     | 0,79     | 2,62    | 0,39    | 0,3  | 0,61 | 0,58 |
| TP11 | 63,07    | 0,44     | 0,51     | 0,31     | 0,69    | 0,42    | 2,35 | 0,17 | 0,62 |
| TP12 | 0,06     | 1,31     | 1,6      | 1,2      | 2,3     | 0,03    | 5,71 | 1,6  | 0,22 |
| TP31 | 1,28     | 0,37     | 0,79     | 1,31     | 2,84    | 0       | 1,08 | 2,96 | 0,6  |
| TP50 | 0,66     | 0,91     | 0,45     | 0,35     | 0,42    | 1409    | 1,03 | 1,49 | 0,65 |
| TP56 | 0,13     | 0,22     | 0,6      | 0,43     | 0,28    | 81,66   | 0,32 | 0,7  | 0,16 |
| TP1  | 1,68     | 1,31     | 0,59     | 0,08     | 0,82    | 1,89    | 8,21 | 2,06 | 0,16 |
| TP16 | 1,17     | 0,93     | 0,48     | 0,46     | 1,26    | 1,63    | 18,5 | 2,42 | 0,22 |
| TP32 | 0,24     | 0,42     | 0,03     | 0,02     | 0,24    | 0,23    | 6,24 | 6,26 | 0,49 |
| TP33 | 0,31     | 0,76     | 0,46     | 0,06     | 0,45    | 0,02    | 5,44 | 1,19 | 0,45 |
| TP38 | 0,47     | 0,69     | 1,11     | 0,29     | 0,23    | 1,88    | 5,03 | 1,57 | 0,39 |

Individual qPCR values expressed as fold increase (Tumor vs normal adjacent tissue). Tumors are ranked according to the number of miRNAs overexpressed.

# Supplementary Table 3

| Orthotopic PDX | N of slides analyzed | Percentage of stroma<br>(mean $\pm$ SD) | Range |
|----------------|----------------------|-----------------------------------------|-------|
| PDX_TP1        | 5                    | 8,9 $\pm$ 3,4                           | 5-20  |
| PDX_TP5        | 6                    | 14,2 $\pm$ 8,6                          | 5-30  |
| PDX_TP7        | 6                    | 7,8 $\pm$ 4,02                          | 5-15  |
| PDX_TP9        | 5                    | 5,5 $\pm$ 2,7                           | <5-15 |
| PDX_TP10       | 8                    | 3,1 $\pm$ 1,2                           | <5-5  |
| PDX_TP11       | 10                   | 16,5 $\pm$ 9,7                          | 10-40 |
| PDX_TP16       | 5                    | 11,5 $\pm$ 8,2                          | <5-20 |
| PDX_TP18       | 9                    | 12,5 $\pm$ 6,9                          | <5-40 |
| PDX_TP19       | 5                    | 16,0 $\pm$ 4,2                          | 10-20 |
| PDX_TP26       | 4                    | 10,0 $\pm$ 4,1                          | 5-15  |

## Supplementary Table 4

|                       | miR-200a                     |     | miR-200b                     |     | miR-200c                     |     | miR-141                      |     | miR-429                      |     |
|-----------------------|------------------------------|-----|------------------------------|-----|------------------------------|-----|------------------------------|-----|------------------------------|-----|
|                       | mean $\Delta\Delta\text{Ct}$ | SD  |
| LV(miR-200ab-miR-429) | -11,1                        | 0,4 | -2,4                         | 2,2 |                              |     |                              |     | -9,3                         | 1,1 |
| LV(miR-200c-miR-141)  |                              |     |                              |     | -1,2                         | 0,8 | -7,8                         | 0,2 |                              |     |
| LV(miR-141)           |                              |     |                              |     |                              |     | -4,9                         | 2,3 |                              |     |
| LV(miR-429)           |                              |     |                              |     |                              |     |                              |     | -6,8                         | 1,3 |

miRNA expression in PANC-1 cells transduced with lentiviral encoding for candidate miRNAs from the miR-200 family. Control cells were transduced with lentiviral vectors encoding for GFP. Results are expressed as  $\Delta\Delta\text{Ct}$  [(Ct miRNA – Ct RNU68) miRNA transduced cells - [(Ct miRNA – Ct RNU68) GFP transduced cells] and are mean +/- SD of 2-3 independent transductions.
